# Supplementary material
Source: publisher figshare collection journal article supplement (https://acs.figshare.com/ndownloader/files/4146289)
Supplement: Supplementary file 1 [file 4146289]

**Supporting information:****Charge transfer interactions in a multichromophoric  
hexaarylbenzene containing pyrene and triarylamines**

By Christoph Lambert\*, Julia Ehbets, Dirk Rausch, Markus Steeger

Institut für Organische Chemie, Universität Würzburg, Wilhelm Conrad Röntgen Research  
Center for Complex Material Systems, Würzburg, Center for Nanosystems Chemistry, Am  
Hubland, 97074 Würzburg

e-mail: christoph.lambert@uni-wuerzburg.de

| Content:                                                                                          | page |
|---------------------------------------------------------------------------------------------------|------|
| <b>Figure S1.</b> $^1\text{H}$ -NMR (600 MHz) of substance <b>1</b> in DCM- $\text{d}_2$          | 3    |
| <b>Figure S2.</b> $^{13}\text{C}$ -NMR (151 MHz) of substance <b>1</b> in DCM- $\text{d}_2$       | 4    |
| <b>Figure S3.</b> COSY of substance <b>1</b> in DCM- $\text{d}_2$ .                               | 5    |
| <b>Figure S4.</b> HMBC of substance <b>1</b> in DCM- $\text{d}_2$ .                               | 6    |
| <b>Figure S5.</b> HSQC of substance <b>1</b> in DCM- $\text{d}_2$ .                               | 7    |
| <b>Figure S6.</b> ESI of substance <b>1</b> .                                                     | 8    |
| <b>Figure S7.</b> $^1\text{H}$ -NMR (600 MHz) of substance <b>2</b> in acetone- $\text{d}_6$ .    | 9    |
| <b>Figure S8.</b> $^{13}\text{C}$ -NMR (151 MHz) of substance <b>2</b> in acetone- $\text{d}_6$ . | 10   |
| <b>Figure S9.</b> COSY of substance <b>2</b> in acetone- $\text{d}_6$ .                           | 11   |
| <b>Figure S10.</b> HMBC of substance <b>2</b> in acetone- $\text{d}_6$ .                          | 12   |
| <b>Figure S11.</b> HSQC of substance <b>2</b> in acetone- $\text{d}_6$ .                          | 13   |
| <b>Figure S12.</b> ESI of substance <b>2</b> .                                                    | 14   |
| <b>Figure S13.</b> $^1\text{H}$ -NMR (600 MHz) of substance <b>3</b> in DCM- $\text{d}_2$ .       | 15   |
| <b>Figure S14.</b> $^{13}\text{C}$ -NMR (151 MHz) of substance <b>3</b> in DCM- $\text{d}_2$ .    | 16   |

|                                                                                                    |    |
|----------------------------------------------------------------------------------------------------|----|
| <b>Figure S15.</b> COSY of substance <b>3</b> in DCM-d <sub>2</sub> .                              | 17 |
| <b>Figure S16.</b> HMBC of substance <b>3</b> in DCM-d <sub>2</sub> .                              | 18 |
| <b>Figure S17.</b> HSQC of substance <b>3</b> in DCM-d <sub>2</sub> .                              | 19 |
| <b>Figure S18.</b> ESI of substance <b>3</b> .                                                     | 20 |
| <b>Figure S19.</b> <sup>1</sup> H-NMR (600 MHz) of substance <b>4</b> in acetone-d <sub>6</sub> .  | 21 |
| <b>Figure S20.</b> <sup>13</sup> C-NMR (151 MHz) of substance <b>4</b> in acetone-d <sub>6</sub> . | 22 |
| <b>Figure S21.</b> COSY of substance <b>4</b> in acetone-d <sub>6</sub> .                          | 23 |
| <b>Figure S22.</b> HMBC of substance <b>4</b> in acetone-d <sub>6</sub> .                          | 24 |
| <b>Figure S23.</b> HSQC of substance <b>4</b> in acetone-d <sub>6</sub> .                          | 25 |
| <b>Figure S24.</b> ESI of substance <b>4</b> .                                                     | 26 |
| <b>Figure S25.</b> <sup>1</sup> H-NMR (600 MHz) of substance <b>5</b> in chloroform-d.             | 27 |
| <b>Figure S26.</b> <sup>13</sup> C-NMR (151 MHz) of substance <b>5</b> in chloroform-d.            | 28 |

<sup>1</sup>H-NMR of substance 1

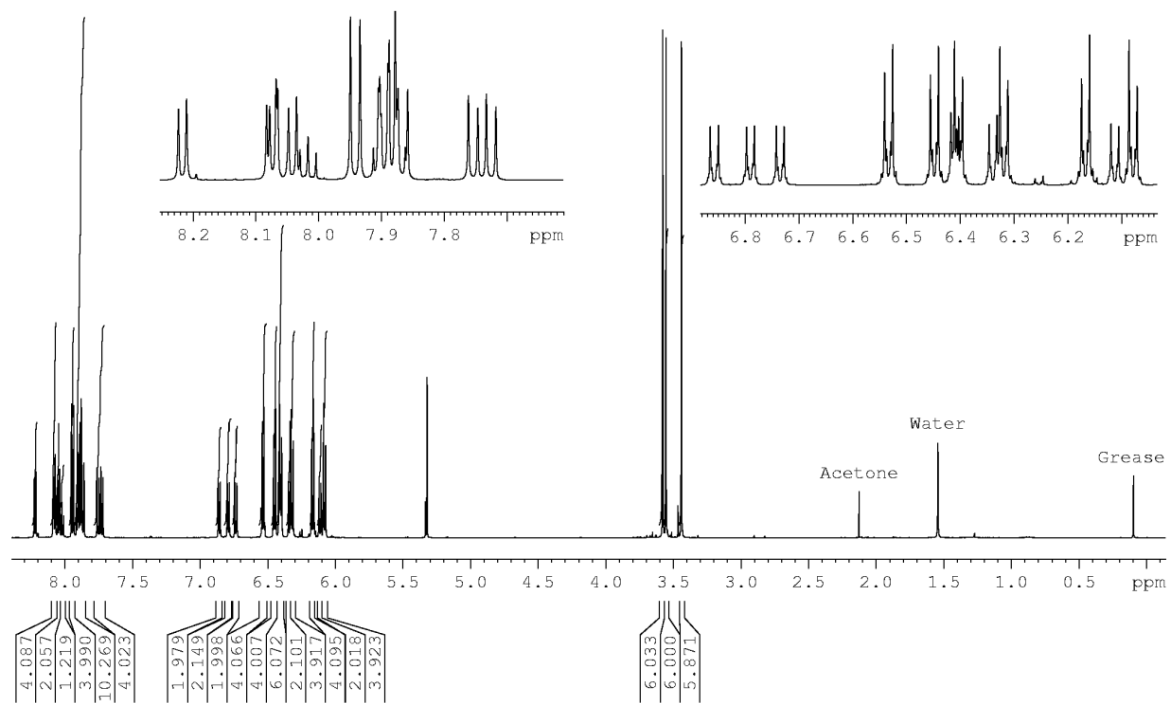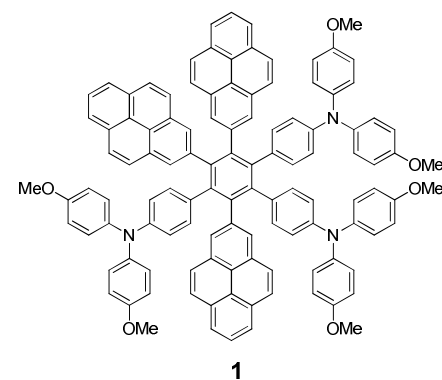

**Figure S1.** <sup>1</sup>H-NMR (600 MHz) of substance **1** in DCM-d<sub>2</sub>.

$^{13}\text{C}$ -NMR of substance 1

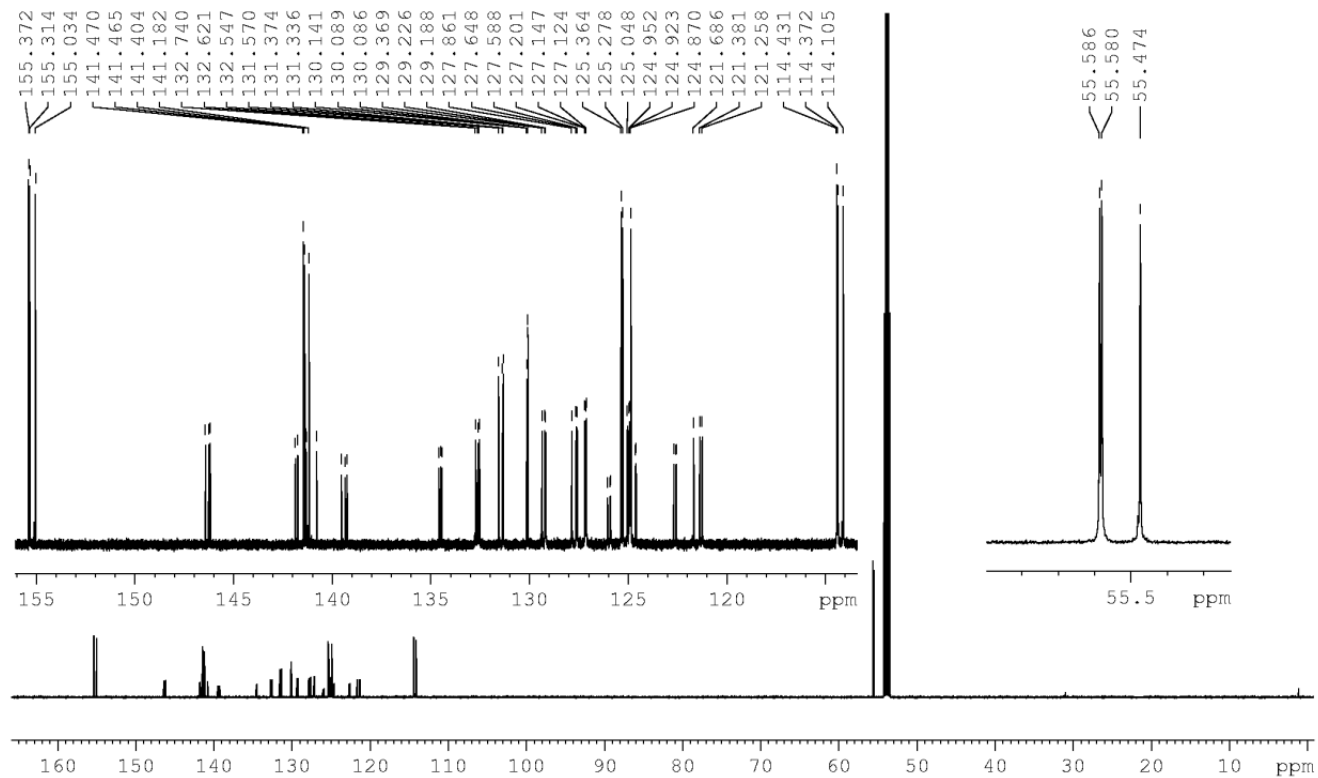

**Figure S2.**  $^{13}\text{C}$ -NMR (151 MHz) of substance 1 in  $\text{DCM-d}_2$ .

COSY substance 1

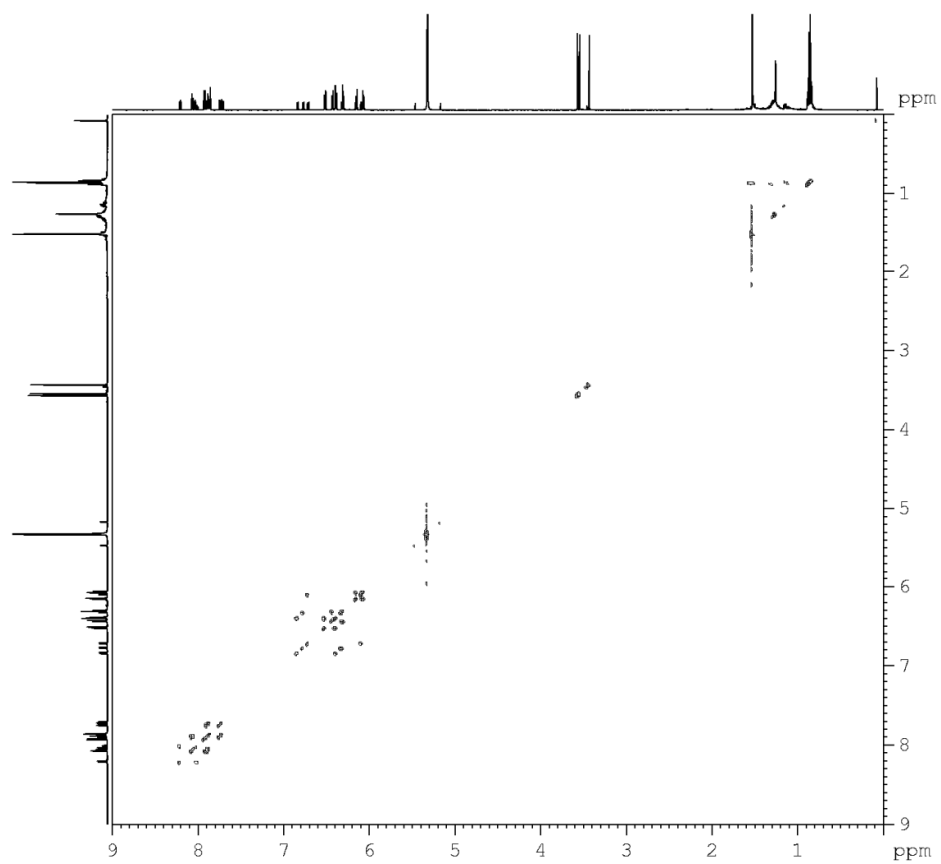

**Figure S3.** COSY of substance **1** in DCM-d<sub>2</sub>.

HMBC substance 1

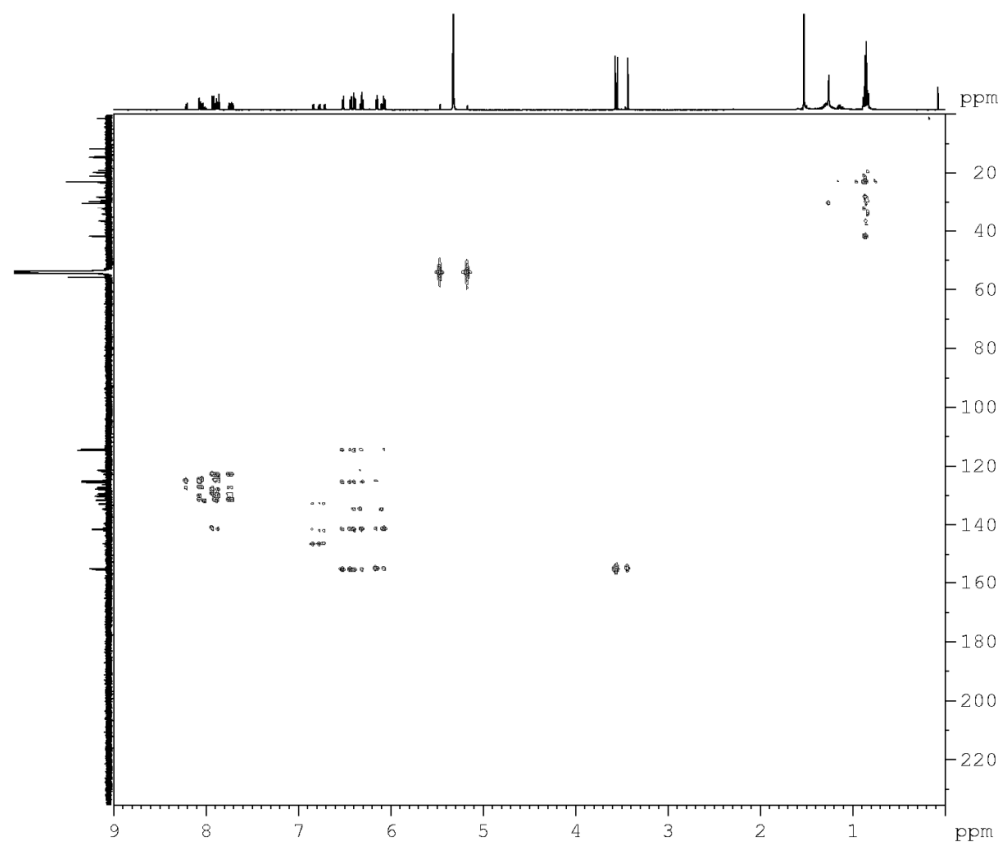**Figure S4.** HMBC of substance 1 in DCM-d<sub>2</sub>.

HSQC substance 1

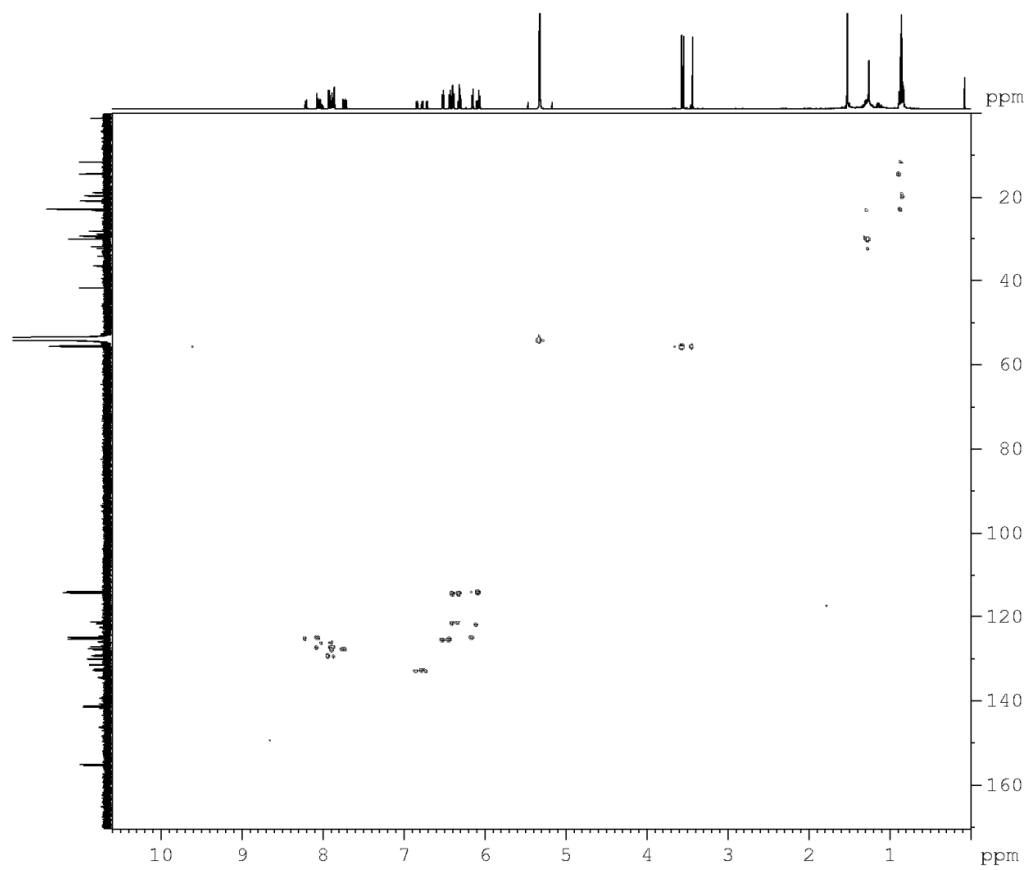

**Figure S5.** HSQC of substance **1** in DCM-d<sub>2</sub>.

## Mass Spectrum Molecular Formula Report

## Analysis Info

Analysis Name D:\Data\Spektren2012\2012\_0129.d  
Method esi\_tune\_pos\_high.m  
Comment Julia Ehbets  
JE23.7-fest  
11 pmol /  $\mu$ l in Aceton

Acquisition Date 26.01.2012 15:11:16  
Operator Administrator  
Instrument microTOF 88

## Acquisition Parameter

|             |          |                |          |                    |        |
|-------------|----------|----------------|----------|--------------------|--------|
| Source Type | ESI      | Ion Polarity   | Positive | Set Corrector Fill | 42 V   |
| Scan Range  | n/a      | Capillary Exit | 400.0 V  | Set Pulsar Pull    | 802 V  |
| Scan Begin  | 50 m/z   | Hexapole RF    | 800.0 V  | Set Pulsar Push    | 804 V  |
| Scan End    | 3000 m/z | Skimmer 1      | 50.0 V   | Set Reflector      | 1700 V |
|             |          | Hexapole 1     | 23.0 V   | Set Flight Tube    | 8600 V |
|             |          |                |          | Set Detector TOF   | 1970 V |

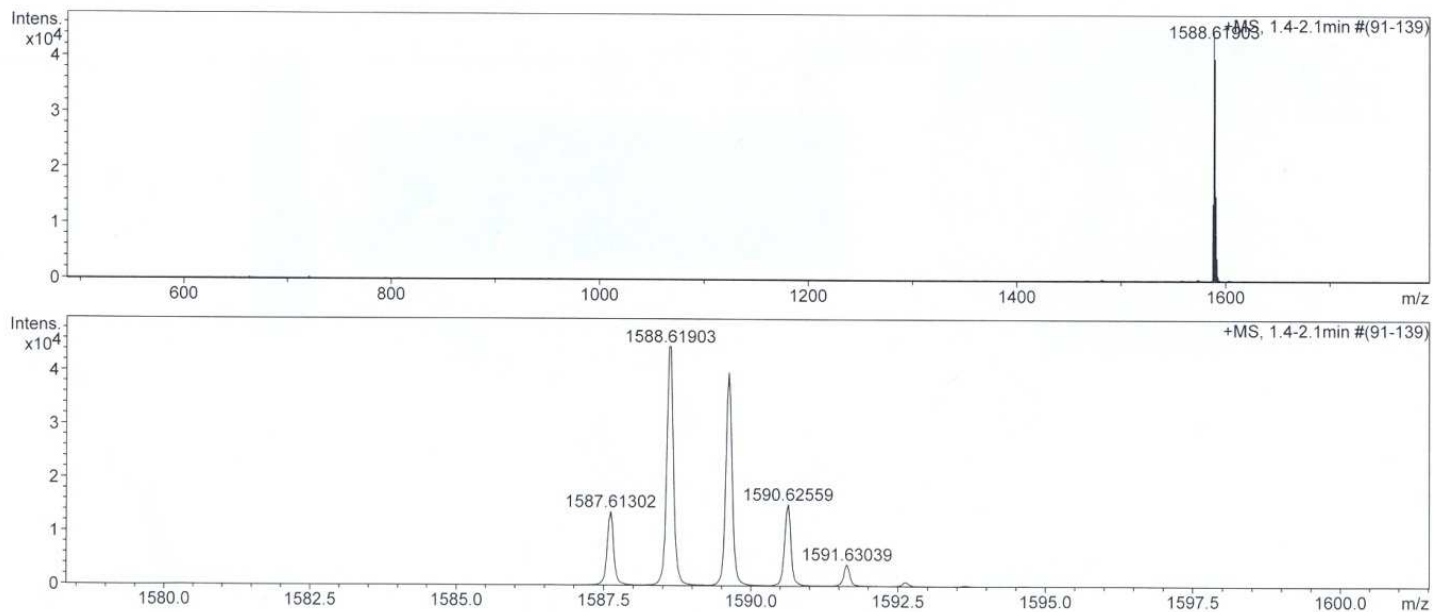

Figure S6. ESI of substance 1.



<sup>1</sup>H-NMR of substance 2

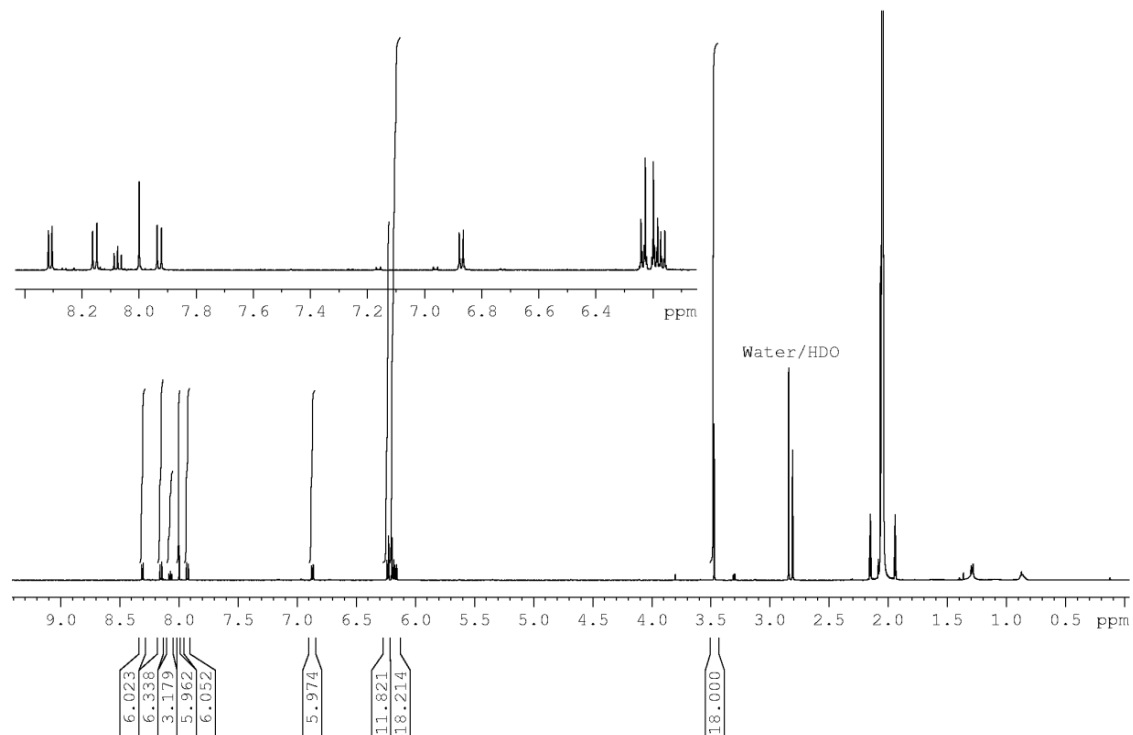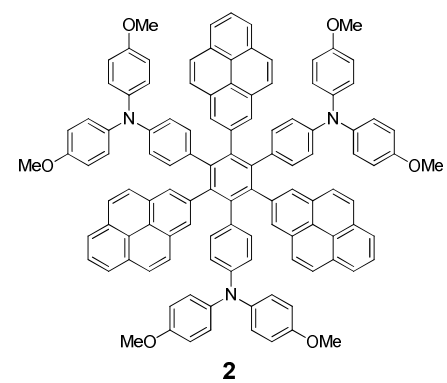

**Figure S7.** <sup>1</sup>H-NMR (600 MHz) of substance **2** in acetone-d<sub>6</sub>.

$^{13}\text{C}$ -NMR of substance 2

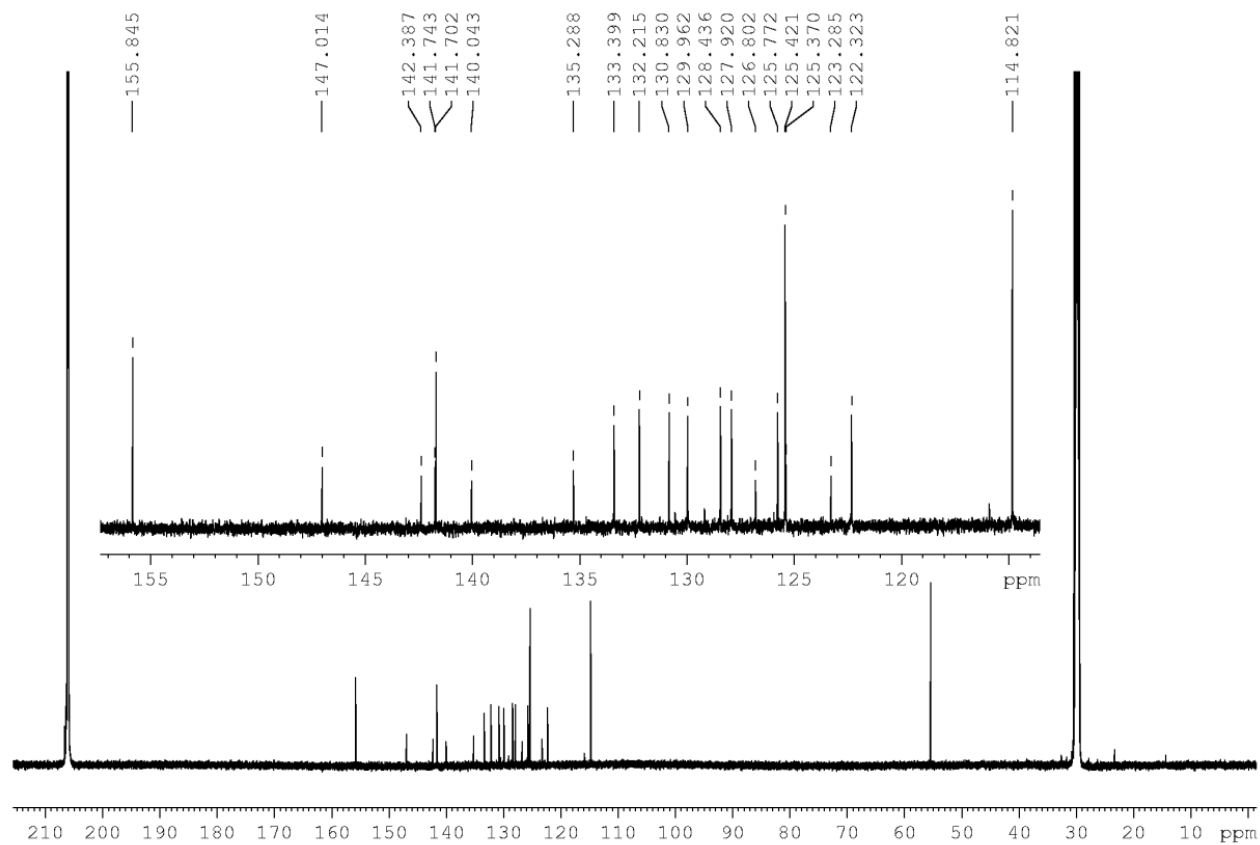

**Figure S8.**  $^{13}\text{C}$ -NMR (151 MHz) of substance 2 in acetone- $\text{d}_6$ .

COSY substance 2

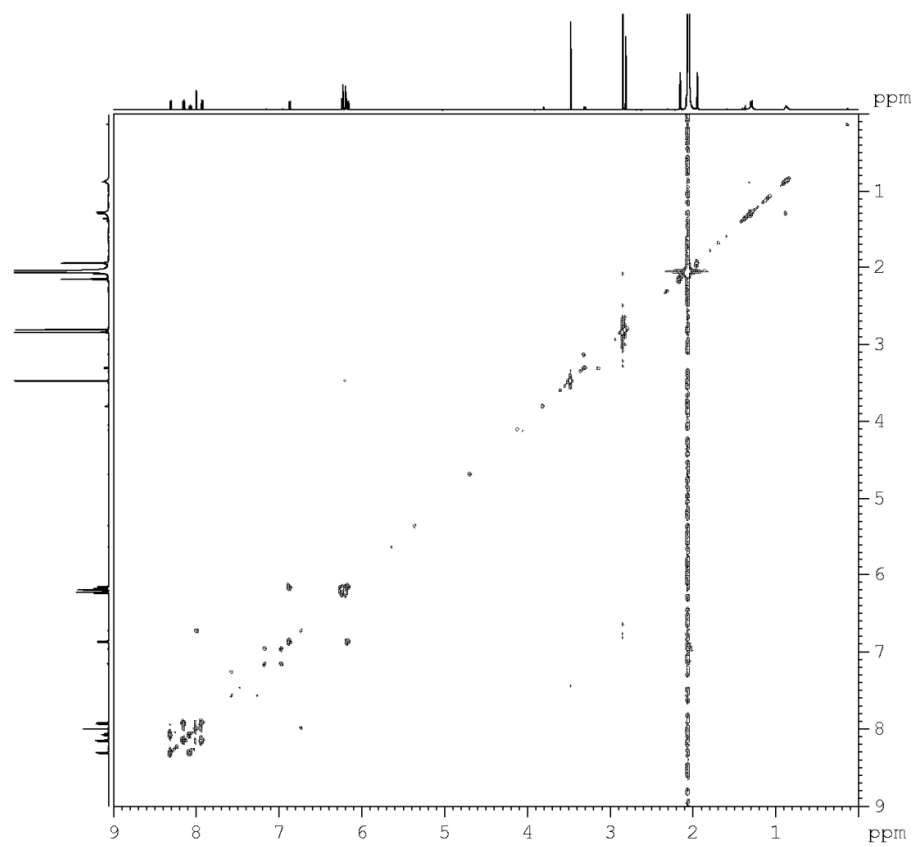

**Figure S9.** COSY of substance **2** in acetone-d<sub>6</sub>.

HMBC substance 2

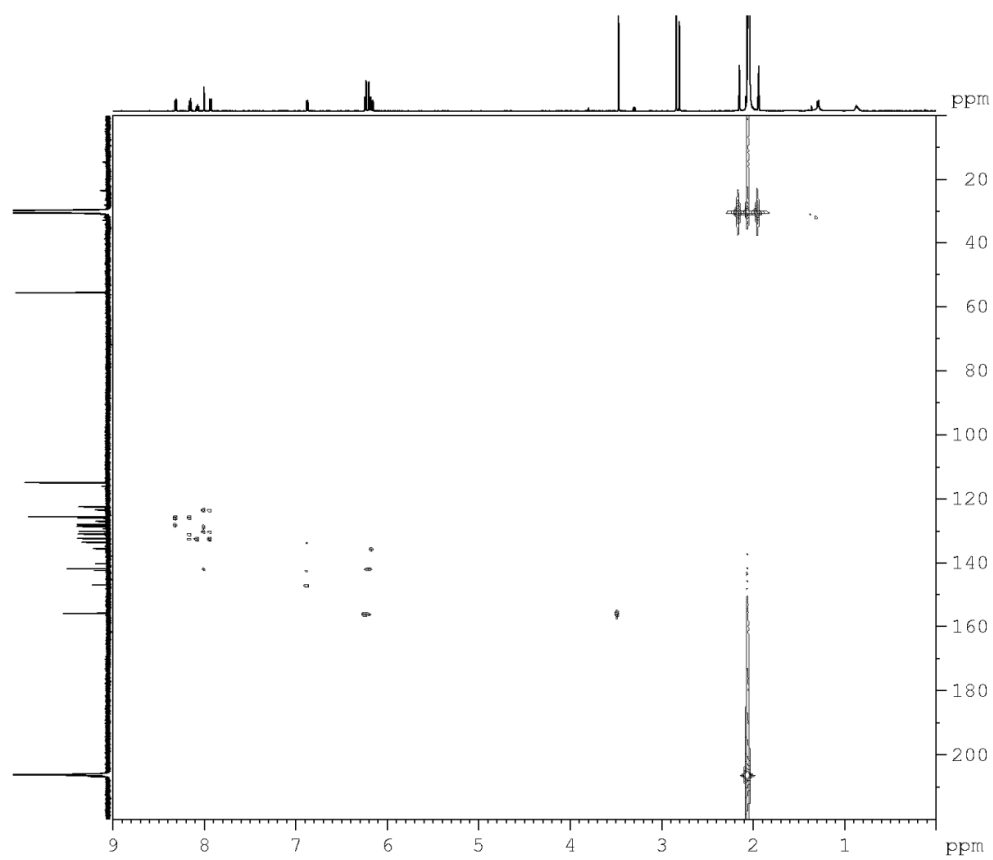

**Figure S10.** HMBC of substance **2** in acetone-d<sub>6</sub>.

HSQC substance 2

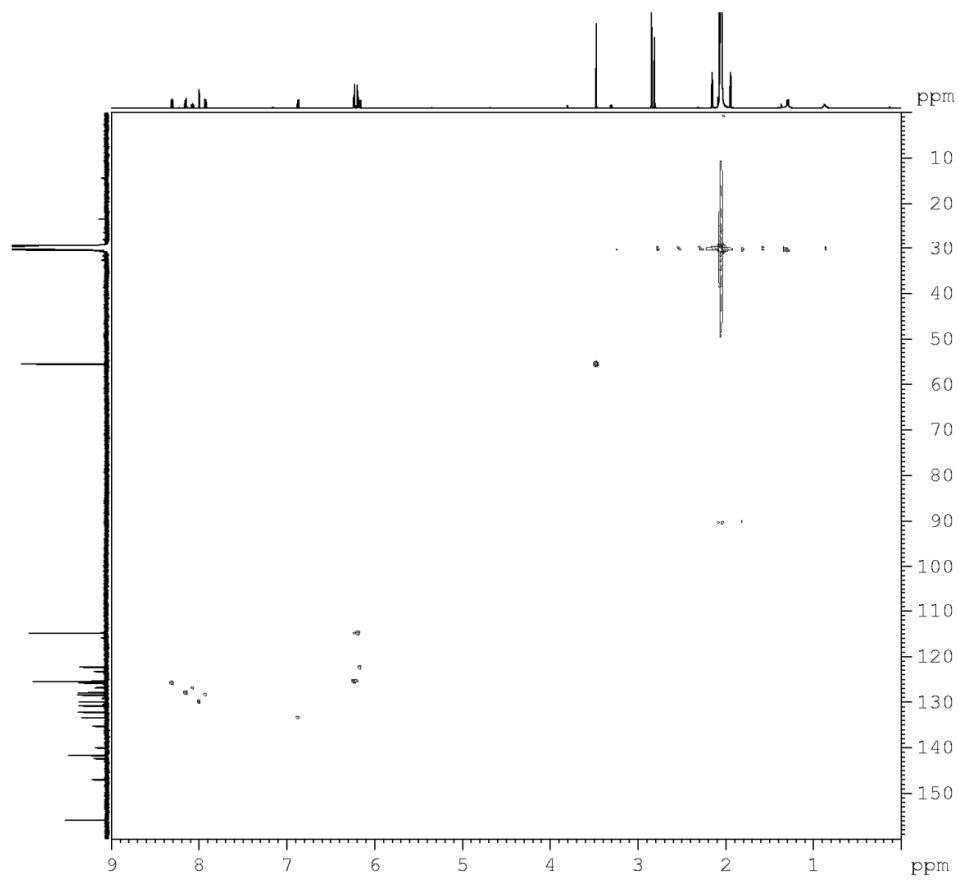

**Figure S11.** HSQC of substance **2** in acetone-d<sub>6</sub>.

## Mass Spectrum Molecular Formula Report

## Analysis Info

Analysis Name D:\Data\Spektren2012\2012\_0117.d  
Method esi\_tune\_pos\_high.m  
Comment Julia Ehbets  
JES  
11 pmol /  $\mu$ l in Aceton

Acquisition Date 24.01.2012 14:36:47  
Operator Administrator  
Instrument micrOTOF 88

## Acquisition Parameter

|             |          |                |          |                    |        |
|-------------|----------|----------------|----------|--------------------|--------|
| Source Type | ESI      | Ion Polarity   | Positive | Set Corrector Fill | 42 V   |
| Scan Range  | n/a      | Capillary Exit | 200.0 V  | Set Pulsar Pull    | 802 V  |
| Scan Begin  | 50 m/z   | Hexapole RF    | 800.0 V  | Set Pulsar Push    | 804 V  |
| Scan End    | 3000 m/z | Skimmer 1      | 50.0 V   | Set Reflector      | 1700 V |
|             |          | Hexapole 1     | 23.0 V   | Set Flight Tube    | 8600 V |
|             |          |                |          | Set Detector TOF   | 1980 V |

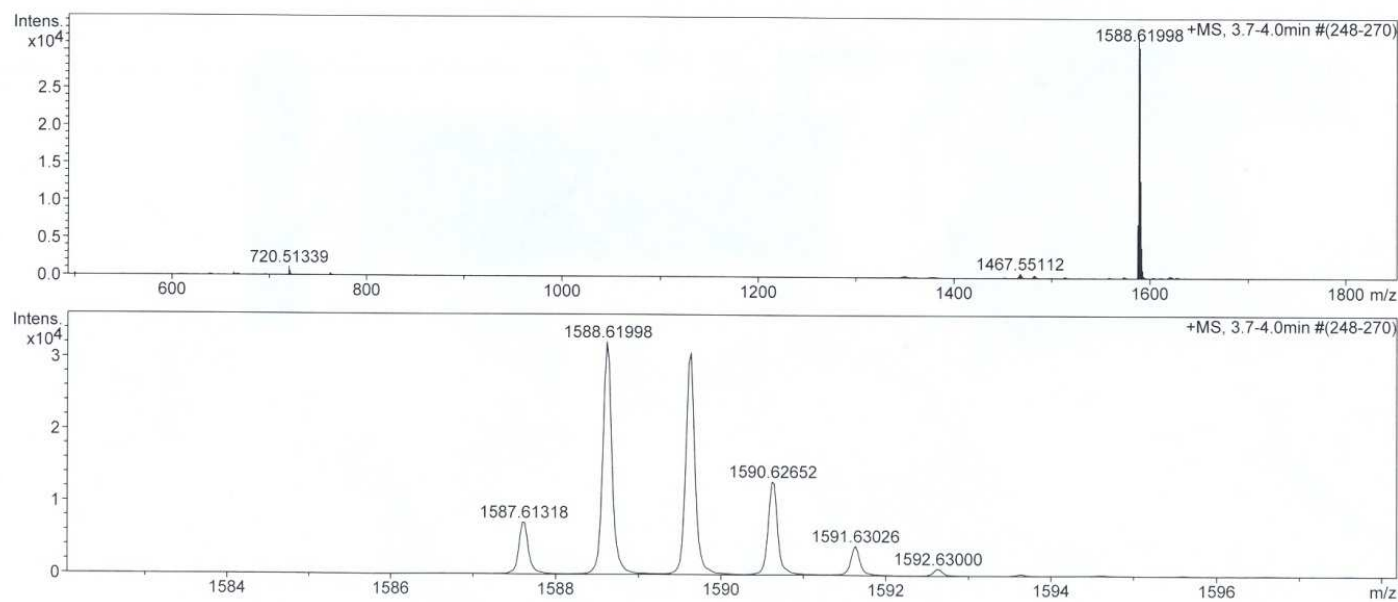

Figure S12. ESI of substance 2.

<sup>1</sup>H-NMR of substance 3

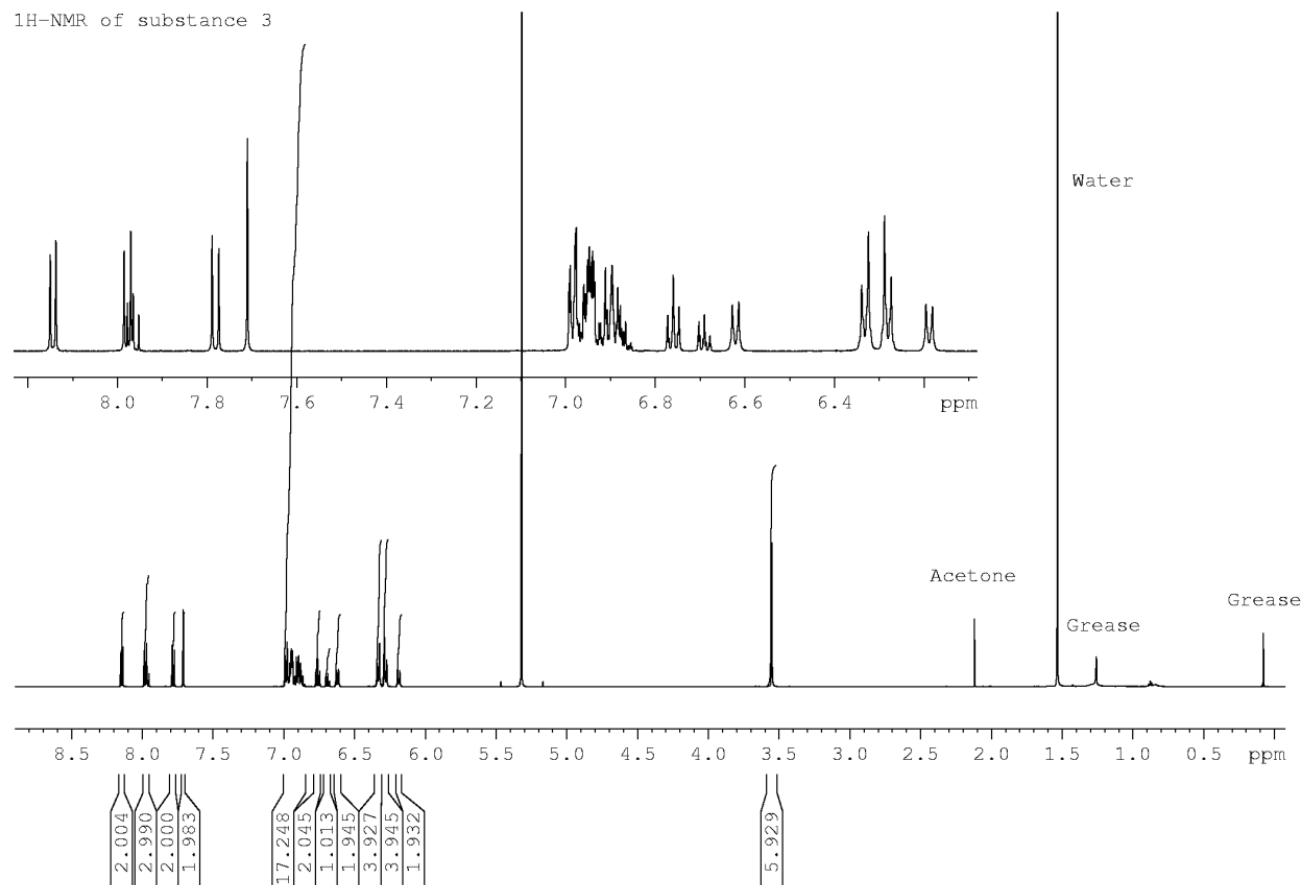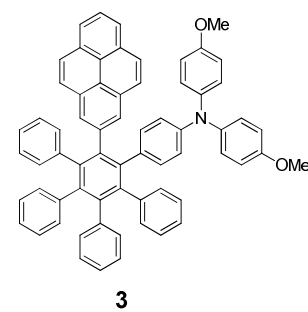

**Figure S13.** <sup>1</sup>H-NMR (600 MHz) of substance **3** in DCM-d<sub>2</sub>.

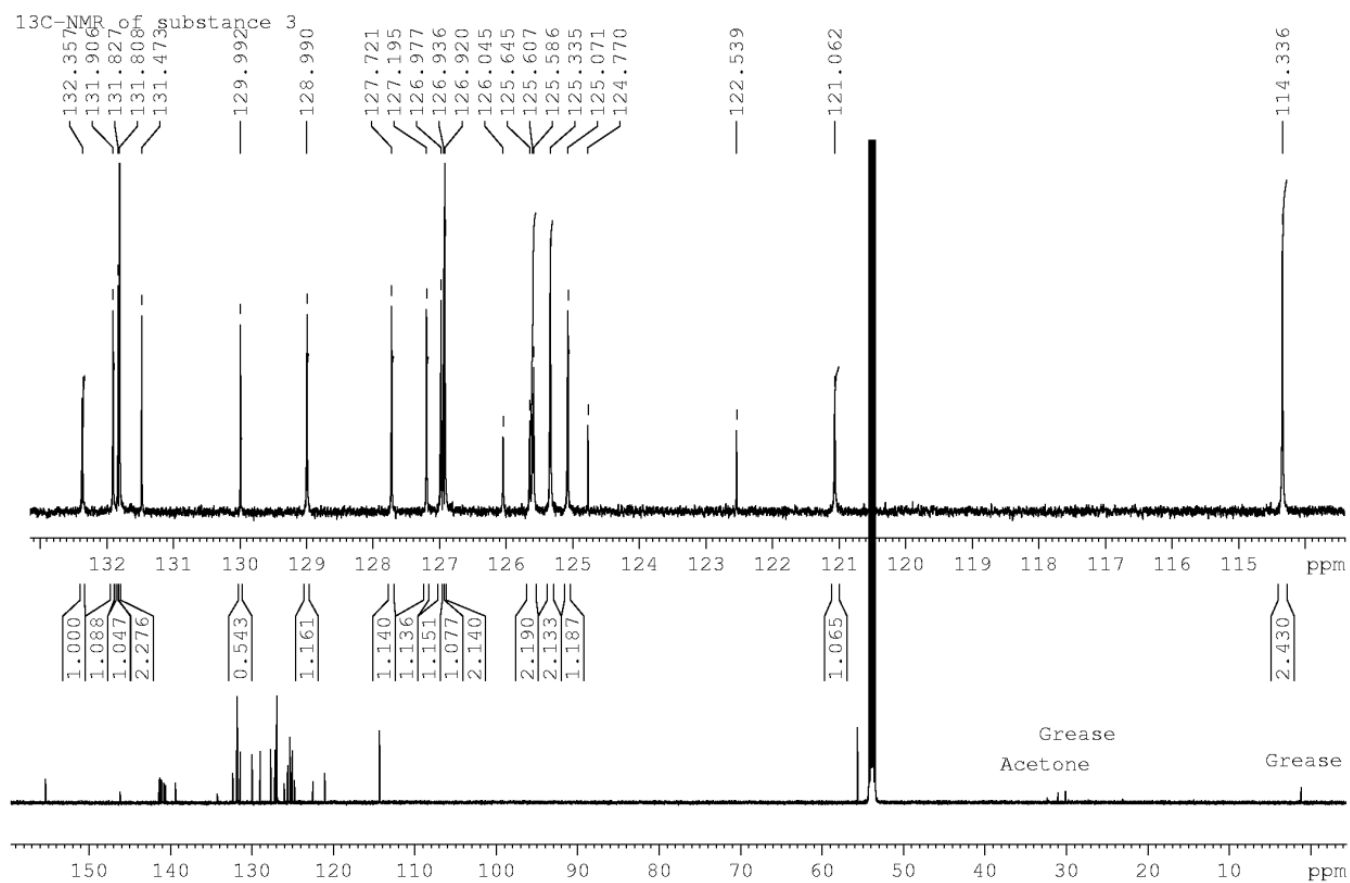

**Figure S14.** <sup>13</sup>C-NMR (151 MHz) of substance **3** in DCM-d<sub>2</sub>.



COSY substance 3

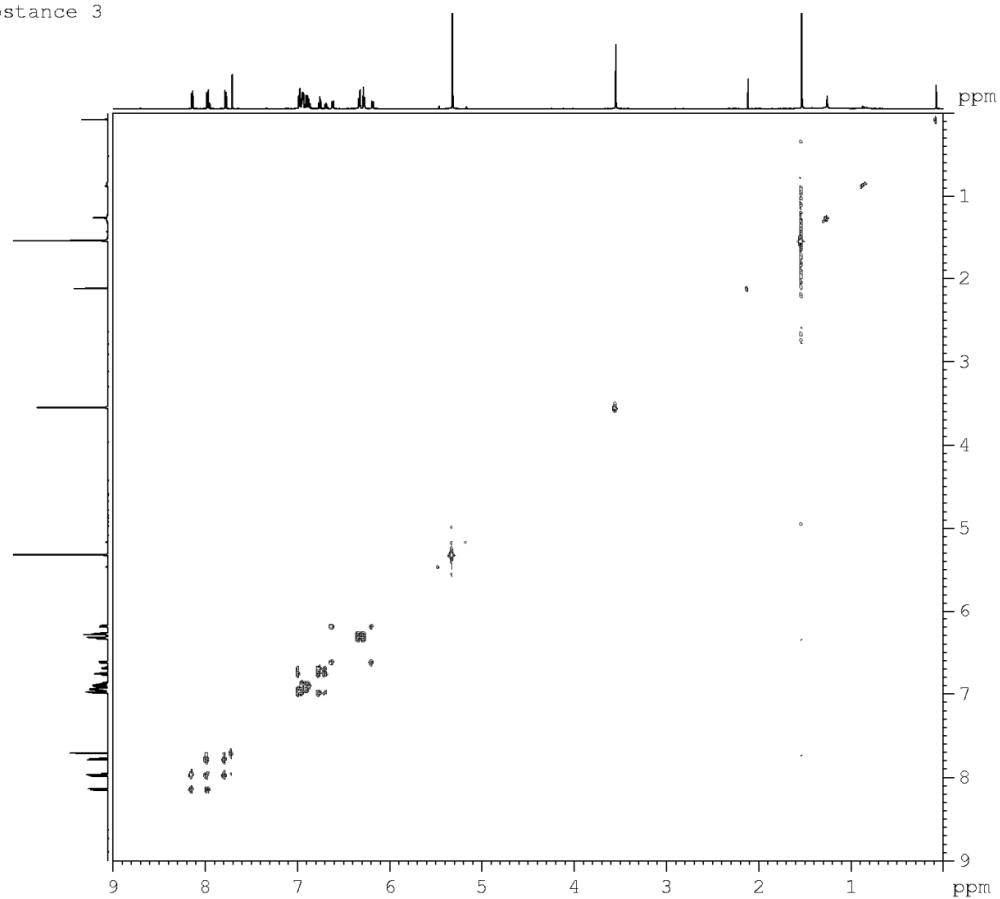

**Figure S15.** COSY of substance **3** in DCM-d<sub>2</sub>.

HMBC substance 3

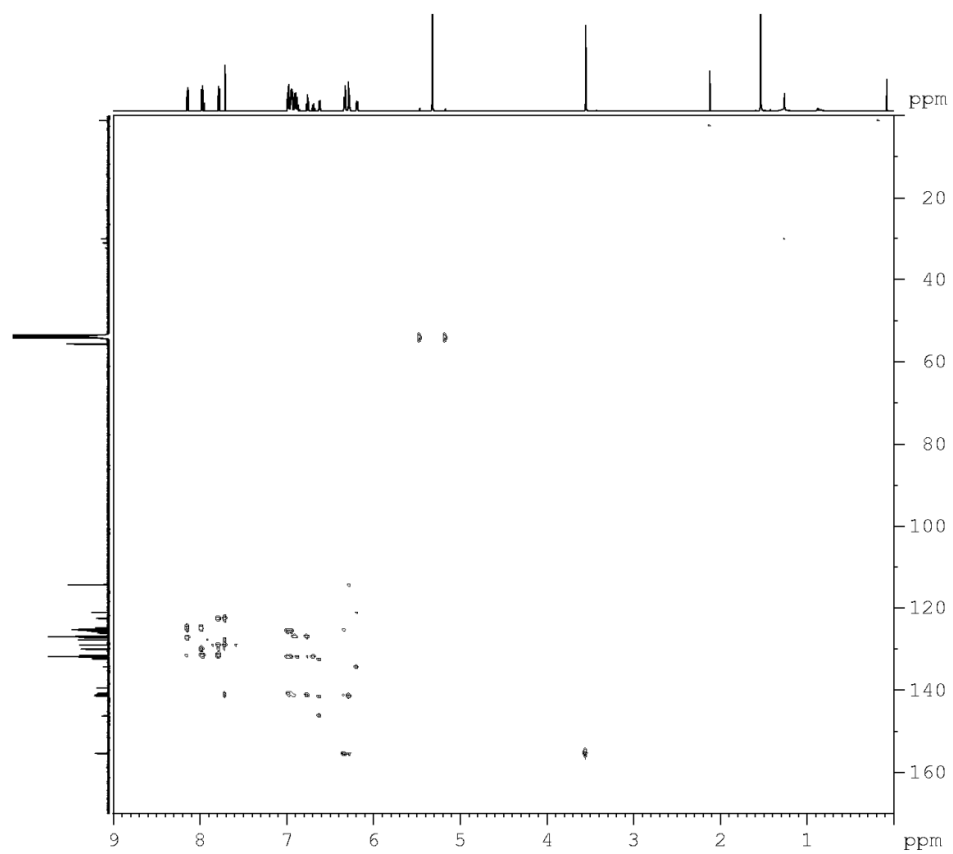

**Figure S16.** HMBC of substance **3** in DCM-d<sub>2</sub>.

HSQC substance 3

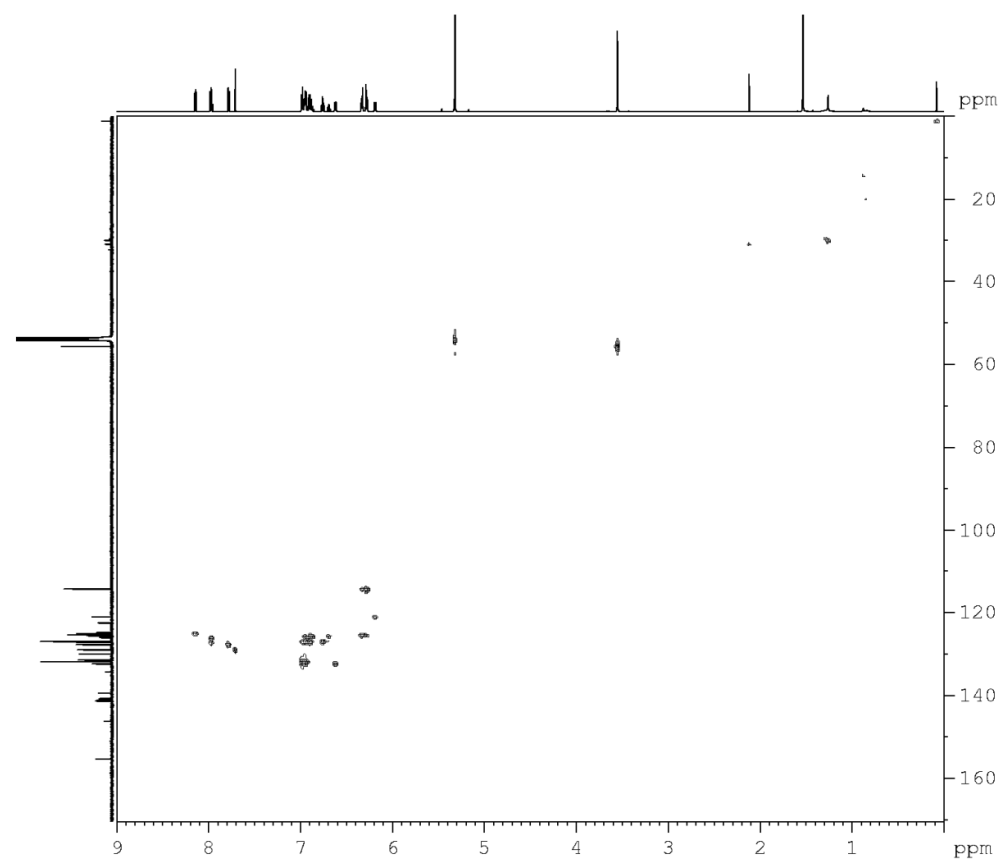

**Figure S17.** HSQC of substance **3** in DCM-d<sub>2</sub>.

## Mass Spectrum Molecular Formula Report

## Analysis Info

Analysis Name D:\Data\Spektren2012\2012\_0204.d  
Method esi\_tune\_pos\_wide.m  
Comment Julia Ehbets  
JE25.3-1  
4 pmol /  $\mu$ l in Aceton

Acquisition Date 03.02.2012 10:38:28  
Operator Administrator  
Instrument micrOTOF 88

## Acquisition Parameter

|             |          |                |          |                    |        |
|-------------|----------|----------------|----------|--------------------|--------|
| Source Type | ESI      | Ion Polarity   | Positive | Set Corrector Fill | 42 V   |
| Scan Range  | n/a      | Capillary Exit | 200.0 V  | Set Pulsar Pull    | 802 V  |
| Scan Begin  | 50 m/z   | Hexapole RF    | 400.0 V  | Set Pulsar Push    | 804 V  |
| Scan End    | 2800 m/z | Skimmer 1      | 50.0 V   | Set Reflector      | 1700 V |
|             |          | Hexapole 1     | 23.0 V   | Set Flight Tube    | 8600 V |
|             |          |                |          | Set Detector TOF   | 1970 V |

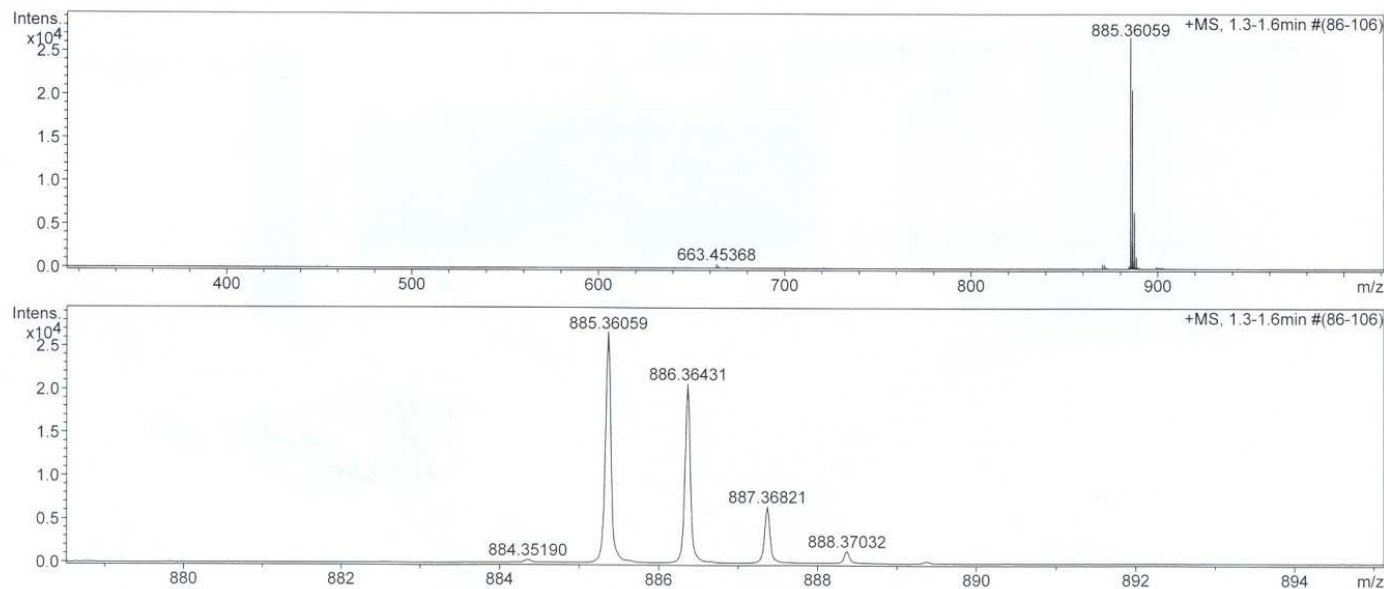

Figure S18. ESI of substance 3.

<sup>1</sup>H-NMR of substance 4

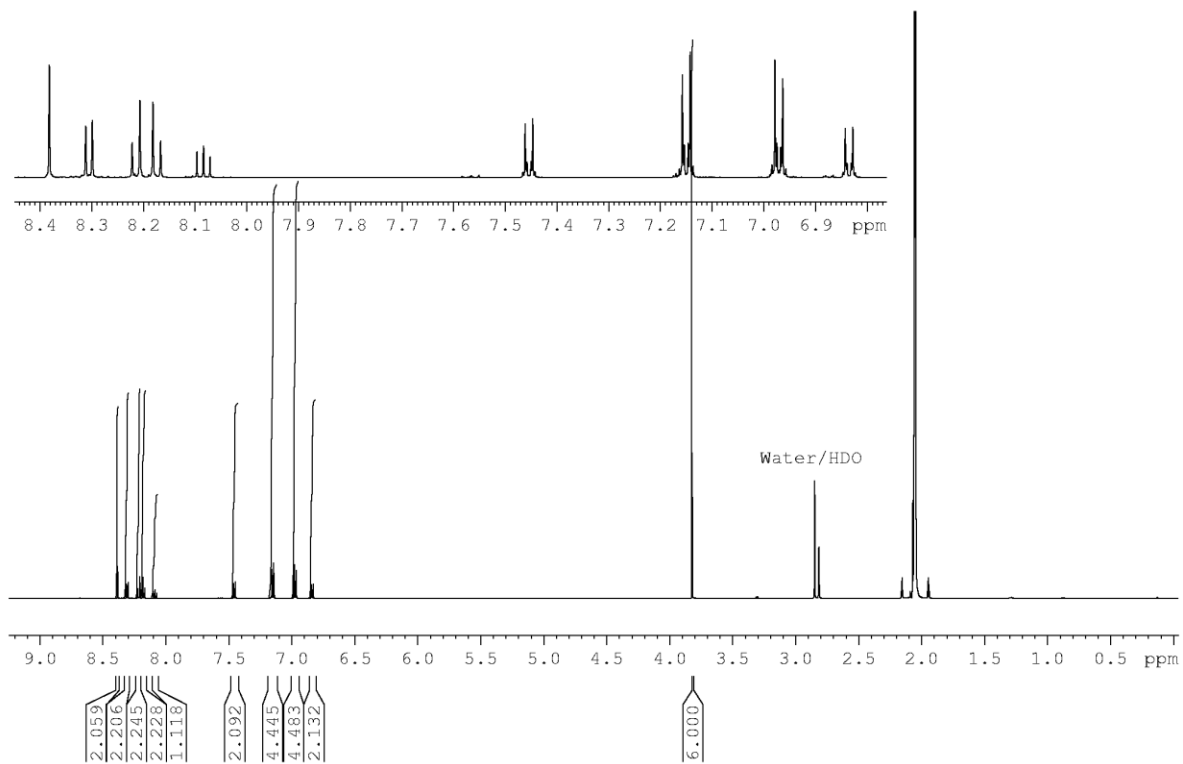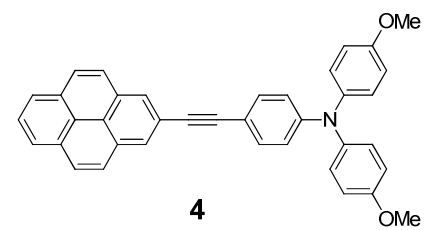

**Figure S19.** <sup>1</sup>H-NMR (600 MHz) of substance **4** in acetone-d<sub>6</sub>.

$^{13}\text{C}$ -NMR of substance 4

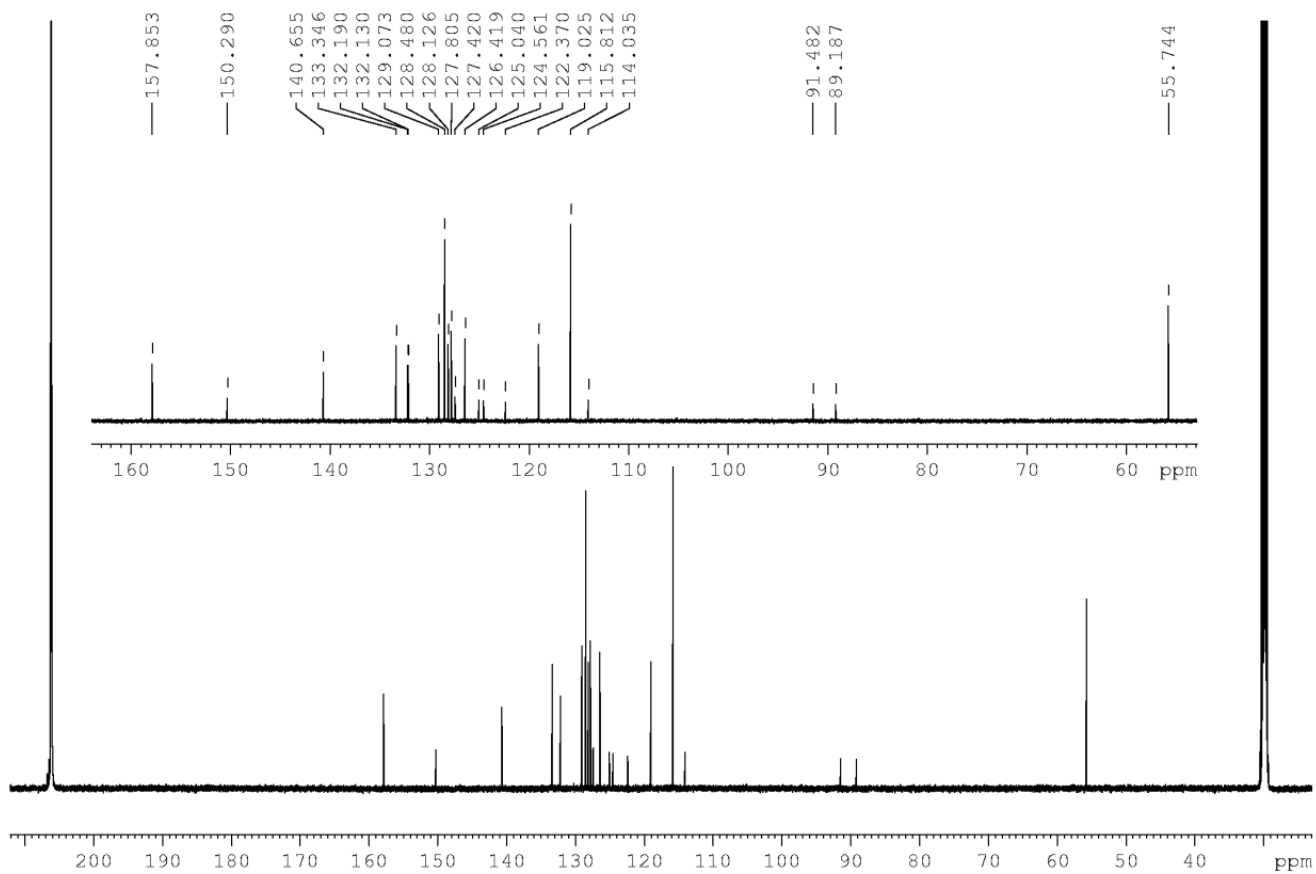

**Figure S20.**  $^{13}\text{C}$ -NMR (151 MHz) of substance 4 in acetone- $\text{d}_6$ .

COSY of substance 4

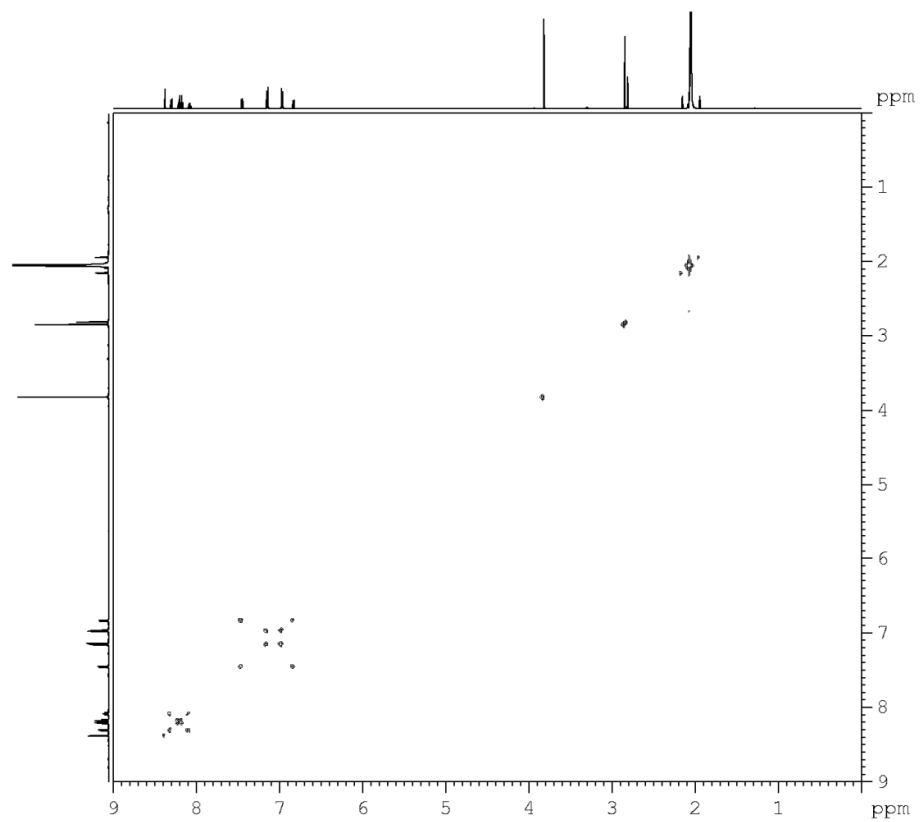**Figure S21.** COSY of substance **4** in acetone-d<sub>6</sub>.

HMBC substance 4

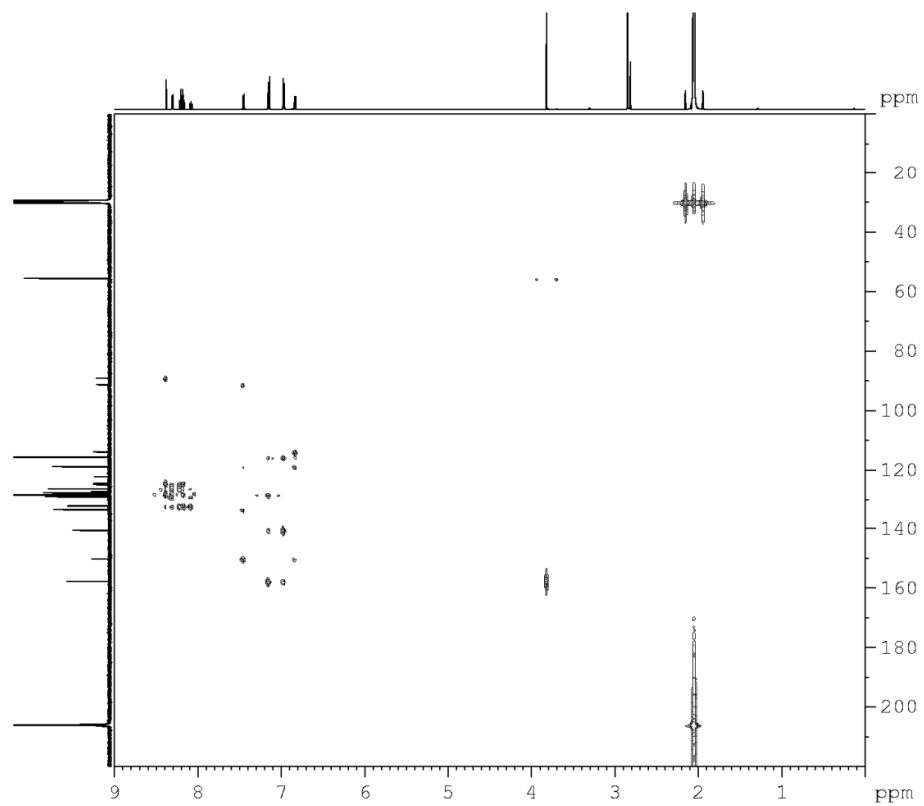**Figure S22.** HMBC of substance **4** in acetone-d<sub>6</sub>.



HSQC substance 4

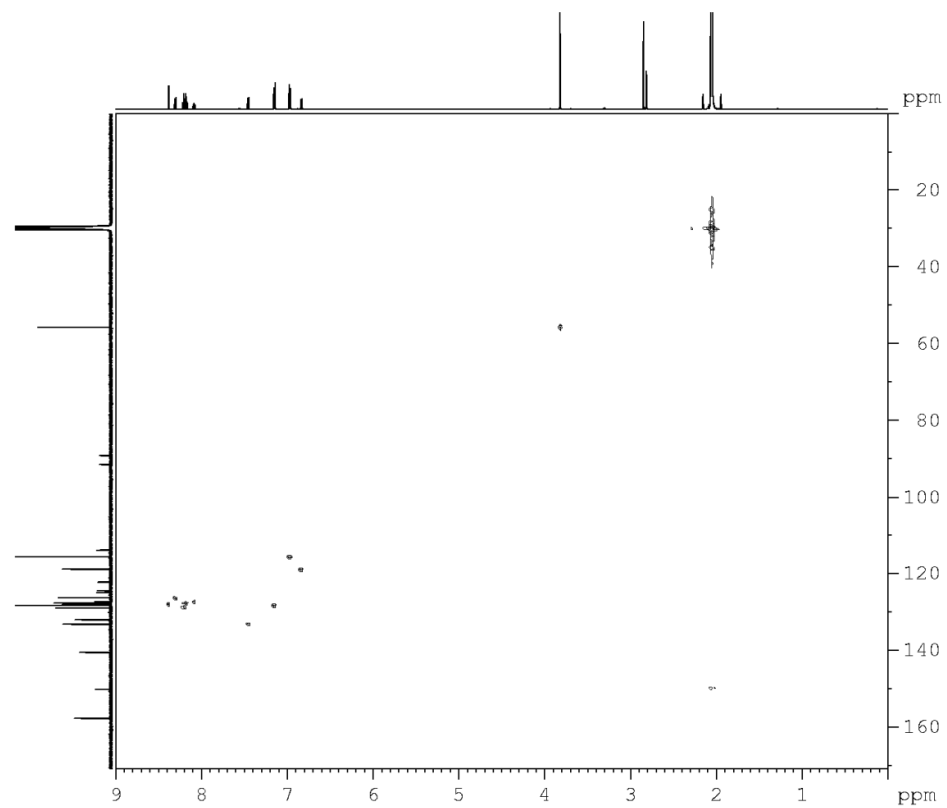

**Figure S23.** HSQC of substance **4** in acetone-d<sub>6</sub>.

## Mass Spectrum Molecular Formula Report

## Analysis Info

Analysis Name D:\Data\Spektren2012\2012\_0078.d  
Method esi\_tune\_pos\_wide.m  
Comment Julia Ehbets  
JE8.19VII-2  
2,5 pmol /  $\mu$ l in Aceton

Acquisition Date 19.01.2012 14:59:35  
Operator Administrator  
Instrument micrOTOF 88

## Acquisition Parameter

Source Type ESI  
Scan Range n/a  
Scan Begin 50 m/z  
Scan End 1650 m/z

Ion Polarity Positive  
Capillary Exit 190.0 V  
Hexapole RF 350.0 V  
Skimmer 1 50.0 V  
Hexapole 1 23.0 V

Set Corrector Fill 42 V  
Set Pulsar Pull 802 V  
Set Pulsar Push 804 V  
Set Reflector 1700 V  
Set Flight Tube 8600 V  
Set Detector TOF 1970 V

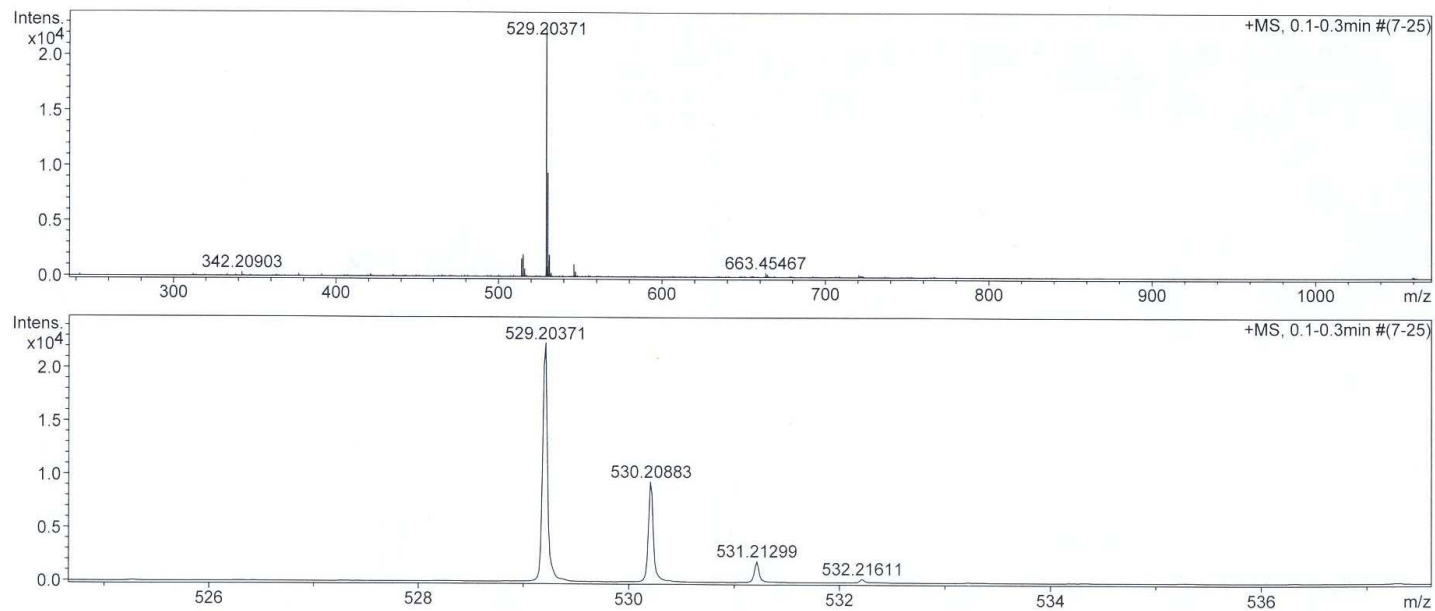

Figure S24. ESI of substance 4.

<sup>1</sup>H-NMR of substance 5

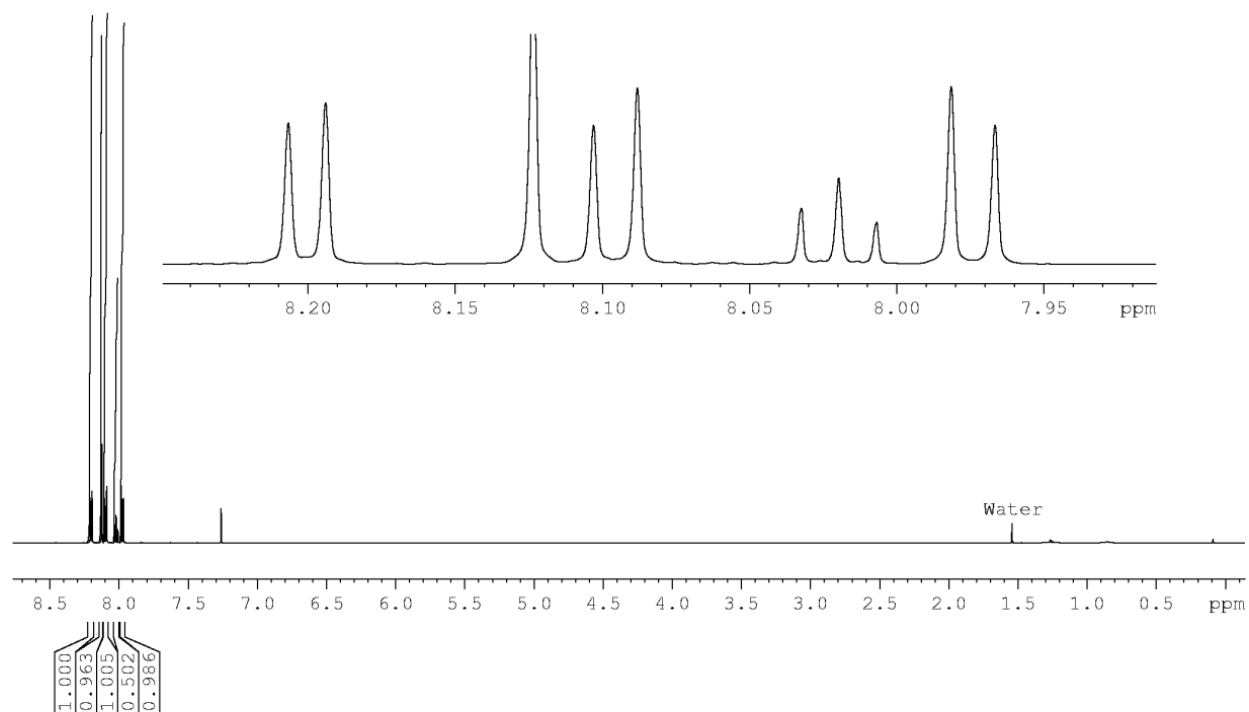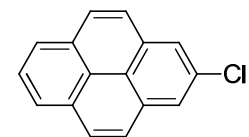

**5**

**Figure S25.** <sup>1</sup>H-NMR (600 MHz) of substance **5** in chloroform-d.

$^{13}\text{C}$ -NMR of substance 5

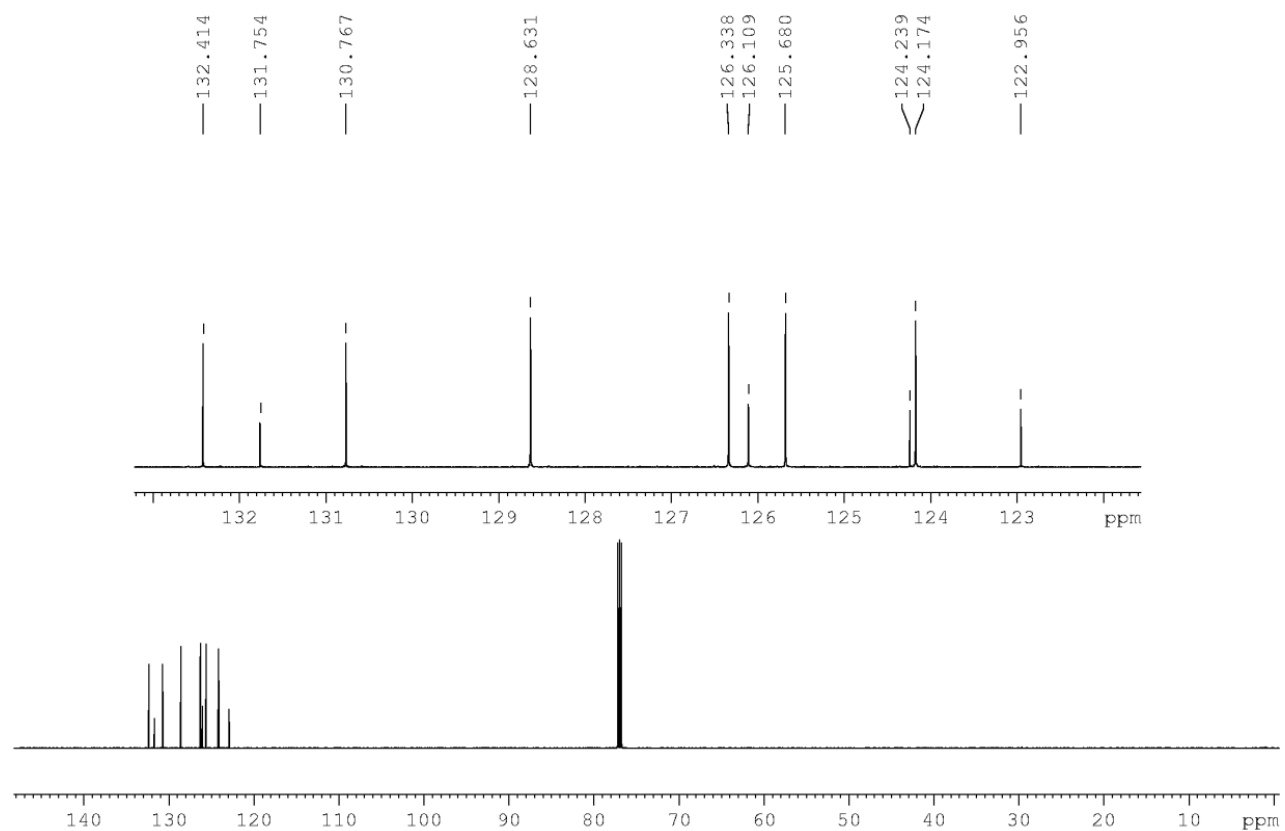

**Figure S26.**  $^{13}\text{C}$ -NMR (151 MHz) of substance 5 in chloroform-d.
